# Supplementary material for: Facile synthesis of near-infrared emitting dBSA-templated Cu nanoclusters for sensitive detection of heparin
Source: Royal Society of Chemistry journal article supplement (doi:10.1039/c8tb01733f), 2018-01-01
Supplement: c8tb01733f1.pdf [file c8tb01733f1.pdf]

1 **Facile synthesis of near-infrared emitting dBSA-templated Cu**  
2 **nanoclusters for sensitive detection of heparin**

3 Xiao-Man Wu, Fei Zhang\* and Yan Li\*

4 *Key laboratory of Inorganic-Organic Hybrid Functional Material*

5 *Chemistry (Tianjin Normal University), Ministry of Education, Tianjin*

6 *Key Laboratory of Structure and Performance for Functional Molecule,*

7 *College of Chemistry, Tianjin Normal University, 393 Binshui West Road,*

8 *Tianjin 300387, PR China*

9 \*Corresponding authors. E-mail address: nkliyan398@gmail.com (Y. Li).

10 [hxyzf@tjnu.edu.cn](mailto:hxyzf@tjnu.edu.cn) (F. Zhang)

11

12

13

14

15

16

17

18

19

20

21

22

23

24

25

26

27

28

29

30

31

32

33

34

1  
2  
3  
4  
5  
6  
7  
8  
9  
10  
11  
12  
13  
14  
15  
16  
17  
18  
19  
20  
21  
22  
23  
24

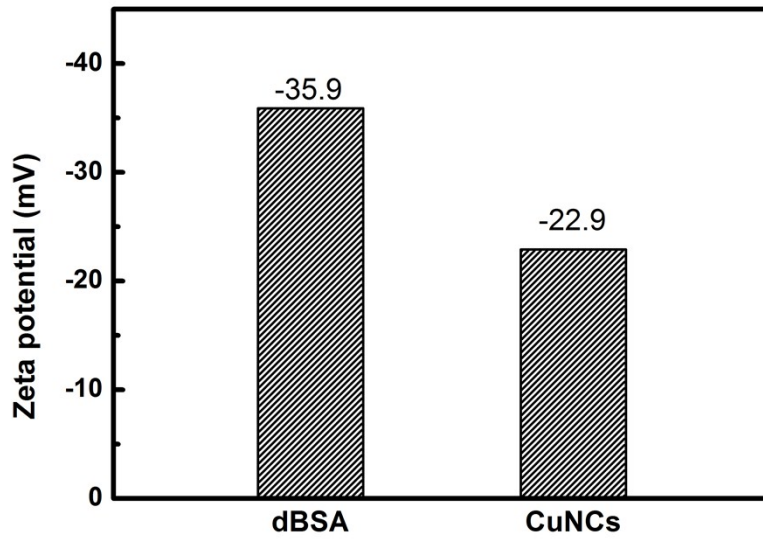

**Fig. S1** Zeta potential of dBSA and CuNCs

1  
2  
3  
4  
5  
6  
7  
8  
9  
10  
11  
12  
13  
14  
15  
16

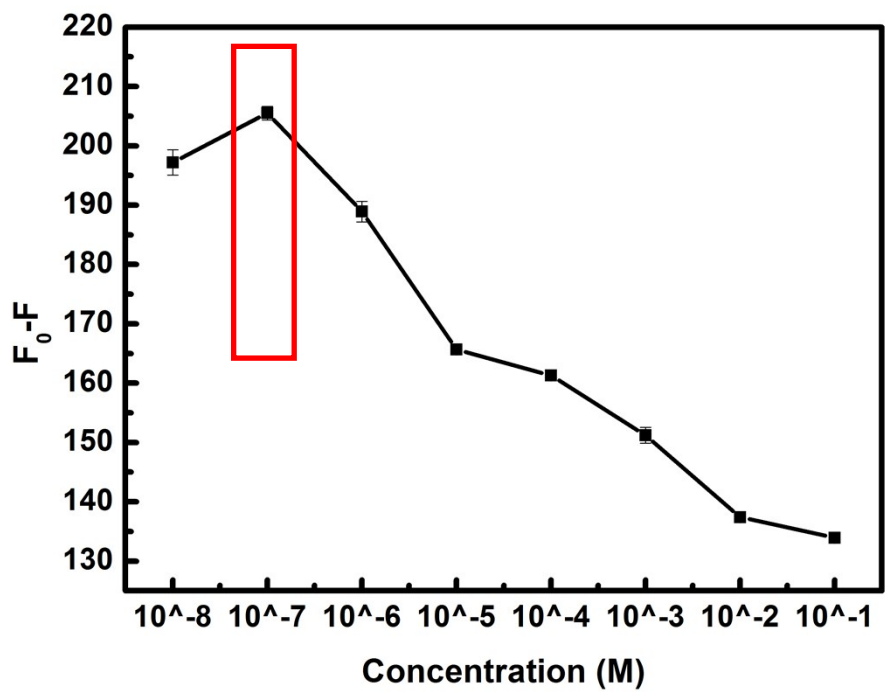

**Fig. S2** The fluorescence spectra of resultant dBSA-Cu NCs under different concentrations of PBS buffer.
